# Supplementary material for: Development of a Scale to Measure Infant Eating Behaviour Worldwide
Source: MDPI journal article supplement (doi:10.3390/nu13082495), 2021-07-22

## Supplementary tables

**Table S 1: Timetable and sequencing of development of eating behaviour scales for International Complementary Feeding Evaluation tool (ICFET)**

|         |                                                                                                                                                                                                                   |                                                                                                                                                                                          |
|---------|-------------------------------------------------------------------------------------------------------------------------------------------------------------------------------------------------------------------|------------------------------------------------------------------------------------------------------------------------------------------------------------------------------------------|
|         | <b>Early work</b>                                                                                                                                                                                                 |                                                                                                                                                                                          |
| 1999    | Initial eating behaviour (EB) questions collated and applied to GMS cohort <sup>9</sup>                                                                                                                           |                                                                                                                                                                                          |
| 2009    | Second analysis of GMS EB data to form appetite scale, broadly unsuccessful <sup>26</sup>                                                                                                                         |                                                                                                                                                                                          |
| 2014-16 | First draft of ICFET <sub>1</sub> including GMS EB phrases developed and tested in Kenya and Ghana <sup>18</sup>                                                                                                  |                                                                                                                                                                                          |
|         | <b>Video study with parents</b>                                                                                                                                                                                   | <b>Survey work with parents and children</b>                                                                                                                                             |
| 2016-17 | GMS EB phrases supplemented with selected CEBQ items to form 1 <sup>st</sup> prototype; video methodology developed and piloted in UK (English and Urdu) and EB phrases refined to form 2 <sup>nd</sup> prototype | ICFET <sub>2</sub> developed including 2 <sup>nd</sup> prototype EB phrases and translated into Urdu                                                                                     |
| 2018    | Video study in UK using 2 <sup>nd</sup> EB prototype phrases (English and Urdu) and Hong Kong (Cantonese)                                                                                                         | ICFET <sub>2</sub> tested in Pakistan                                                                                                                                                    |
| 2019    | Video study in Cyprus and Indonesia                                                                                                                                                                               | ICFET <sub>2</sub> tested in UK, translated into Swahili and Spanish and tested in Kenya and Guatemala<br><br>Behaviour questions from ICFET <sub>2</sub> tested in Cyprus and Indonesia |

**Table S 2: Phrases used at different stages and their sources**

\*GMS phrases §CEBQ

Linguistic study pilot

| <b>Avidity</b>                                                                                                                                                                                                     | <b>Avoidance</b>                                                                                                                                                        |
|--------------------------------------------------------------------------------------------------------------------------------------------------------------------------------------------------------------------|-------------------------------------------------------------------------------------------------------------------------------------------------------------------------|
| Enjoys eating §<br>Loves food*<br>Finishes his/her meal quickly §<br>Is interested in food §<br>Is always asking for food §<br>Enjoys a wide variety of foods §<br>Enjoys eating §<br>Looks forward to mealtimes § | Turns away *<br>Pushes food away*<br>Cries/ screams*<br>Holds food in mouth*<br>Spits out food*<br>Eats slowly §<br>Leaves food on his/her plate at the end of a meal § |

Linguistic study definitive

| <b>Avidity</b>                                                                                                                                                                                                                                                                                 | <b>Avoidance</b>                                                                                                                                                                                                          |
|------------------------------------------------------------------------------------------------------------------------------------------------------------------------------------------------------------------------------------------------------------------------------------------------|---------------------------------------------------------------------------------------------------------------------------------------------------------------------------------------------------------------------------|
| Enjoys eating §<br>Loves food* (translated as likes food a lot in most languages)<br>Is interested in food §<br>Is always asking for food §<br>Enjoys a wide variety of food §<br>Eats quickly (modified §)<br>Is willing to try new foods (modified §)<br>Finishes his/ her meal (modified §) | Turns head away (modified*)<br>Pushes food away*<br>Cries/ screams*<br>Holds food in mouth for too long (modified*)<br>Spits out food*<br>Meals often last more than 30 minutes<br>Meals sometimes last more than an hour |

Final included phrases

| <b>Avidity</b>                                                                                                                                                                     | <b>Avoidance</b>                                                                                                                 |
|------------------------------------------------------------------------------------------------------------------------------------------------------------------------------------|----------------------------------------------------------------------------------------------------------------------------------|
| Enjoys eating §<br>Likes food a lot (modified §)<br>Is interested in food §<br>Enjoys a wide variety of food §<br>Eats quickly (modified §)<br>Finishes his/ her meal (modified §) | Turns head away (modified*)<br>Pushes food away*<br>Cries/ screams*<br>Spits out food*<br>Meals sometimes last more than an hour |

**Table S 3: Details of sampling in each setting**

| Study 1        | Location | Participants                                                           | Recruited via                                                                     | Ethics                                                | Study delivery  | Collected by        | Measurements         |
|----------------|----------|------------------------------------------------------------------------|-----------------------------------------------------------------------------------|-------------------------------------------------------|-----------------|---------------------|----------------------|
| UK             |          | Adults who had ever parented a child aged more than 6 months           | Toddler activity groups, Muslim ladies' groups, snowball and convenience sampling | UoG <sup>1</sup> 200160042                            | Interview       | Students            | None                 |
| Hong Kong      |          | Adults who had ever parented a child aged more than 6 months           | Mother and toddler groups, elderly social clubs and community centres             | UoG <sup>1</sup> 200170117                            | Interview       | Student             | None                 |
| Cyprus         |          | Parents of a child currently aged 6-24 months                          | Nurseries, social media advertisement and by snowball and convenience sampling    | UoG <sup>1</sup> 200180123                            | Interview       | Students            | None                 |
| Indonesia      |          | Parents of a child currently aged 6-24 months                          | Community groups & community-based clinics                                        | UoG <sup>1</sup> 200180123                            | Interview       | Student             | None                 |
| <b>Study 2</b> |          |                                                                        |                                                                                   |                                                       |                 |                     |                      |
| UK             |          | Parents and healthy child currently aged 6-24 months                   | Toddler activity groups                                                           | UoG <sup>1</sup> 200180033                            | Self completion | Students            | weight, length       |
| Pakistan       |          | Parents and healthy or undernourished child currently aged 6-24 months | Child health clinics                                                              | UoG <sup>1</sup> 200170181                            | Interview       | Student             | weight, length, MUAC |
| Kenya          |          | Parents and healthy or undernourished child currently aged 6-24 months | Child health and nutrition clinics                                                | Kenya <sup>2</sup> P576-2018                          | Interview       | Research assistants | weight, length, MUAC |
| Guatemala      |          | Parents and healthy or undernourished child currently aged 6-24 months | Community programmes                                                              | UoG 200180131; Guatemala <sup>3</sup> CE/FM-UFM 30-19 | Interview       | Research assistants | weight, length, MUAC |
| Cyprus         |          | Parents and healthy child currently aged 6-24 months                   | Nurseries, social media advertisement and by snowball and convenience sampling    | UoG 200180123                                         | Self completion | Students            | None                 |
| Indonesia      |          | Parents of a healthy child currently aged 6-24 months                  | Community groups & community-based clinics                                        | UoG 200180123                                         | Interview       | Student             | None                 |

<sup>1</sup>University of Glasgow College of MVLS research ethics committee <sup>2</sup>AMREF ethics and scientific review committee

<sup>3</sup>Comité de ética Independiente Facultad de Medicina Universidad Francisco Marroquín / Hospital Universitario Esperanza

**Table S 4: Descriptions of the standard videos used to display different eating behaviours in Study 1**

| <b>Video</b>                    | <b>Description</b>                                                                                                                                                                                                                                                                                                                 |
|---------------------------------|------------------------------------------------------------------------------------------------------------------------------------------------------------------------------------------------------------------------------------------------------------------------------------------------------------------------------------|
| <b>1: Very Enthusiastic</b>     | Pre-school child sitting at a table with her sister. There is a plate of pasta with cheese in front of her. She eats with her hands, eating very quickly, constantly placing food in her mouth.                                                                                                                                    |
| <b>2: Enthusiastic</b>          | Boy aged 15 months is sitting in a highchair with a plate of mashed potato, peas, carrots and stewed meat. He is being fed with cutlery and eats steadily, although not particularly quickly. He asks for food, shows signs of trying to feed himself and shows interest in his meal, picking up food when it falls off the spoon. |
| <b>3: Moderate Food refusal</b> | Three-year-old boy sitting at the table with his mother and a plate of pasta. He is being fed with cutlery but is shown to be distracted and shows little to no interest in his meal. He barely eats in the video.                                                                                                                 |
| <b>4: Severe Food refusal</b>   | A school age boy, but with significant learning disability, at the table with his mother and a plate with plain yogurt. His mother is attempting to feed him with a spoon, but he avoids eating throughout the video, pushing food away when he is being fed.                                                                      |

**Table S 5: Study two: numbers in each group, age and weights (when measured) for healthy and underweight children**

|                              | Normal weight |             |              |            |            |              | Underweight   |            |            |              |               |
|------------------------------|---------------|-------------|--------------|------------|------------|--------------|---------------|------------|------------|--------------|---------------|
|                              | N             | Age, months |              | Number     | %          | Weight z     |               | Number     | %          | Weight z     |               |
|                              |               | Mean        | SD           |            |            | Mean         | SD            |            |            | Mean         | SD            |
| Kenya                        | 157           | 12.5        | (4.0)        | 107        | 68%        | -0.59        | (0.93)        | 50         | 32%        | -2.81        | (0.61)        |
| Pakistan                     | 108           | 15.7        | (5.4)        | 67         | 62%        | -0.17        | (1.16)        | 41         | 38%        | -3.37        | (0.98)        |
| Guatemala                    | 125           | 15.3        | (5.6)        | 80         | 64%        | -0.96        | (0.85)        | 45         | 36%        | -2.75        | (0.59)        |
| UK                           | 107           | 13.3        | (5.5)        | 85         | 97%        | 0.40         | (1.03)        | 3          | 3%         | -2.37        | (0.23)        |
| <b>Total with weights</b>    | <b>478</b>    | <b>14.1</b> | <b>(5.3)</b> | <b>339</b> | <b>71%</b> | <b>-0.35</b> | <b>(1.10)</b> | <b>139</b> | <b>29%</b> | <b>-2.94</b> | <b>(0.78)</b> |
| Cyprus                       | 26            | 17.0        | (6.3)        |            |            |              |               |            |            |              |               |
| Indonesia                    | 50            | 13.8        | (6.0)        |            |            |              |               |            |            |              |               |
| <b>Total with ICFET data</b> | <b>573</b>    | <b>14.2</b> | <b>(5.4)</b> |            |            |              |               |            |            |              |               |

**Supplementary figure: Study 1: Percentage of participants showing full agreement, some uncertainty, or disagreement with each phrase across the four videos**

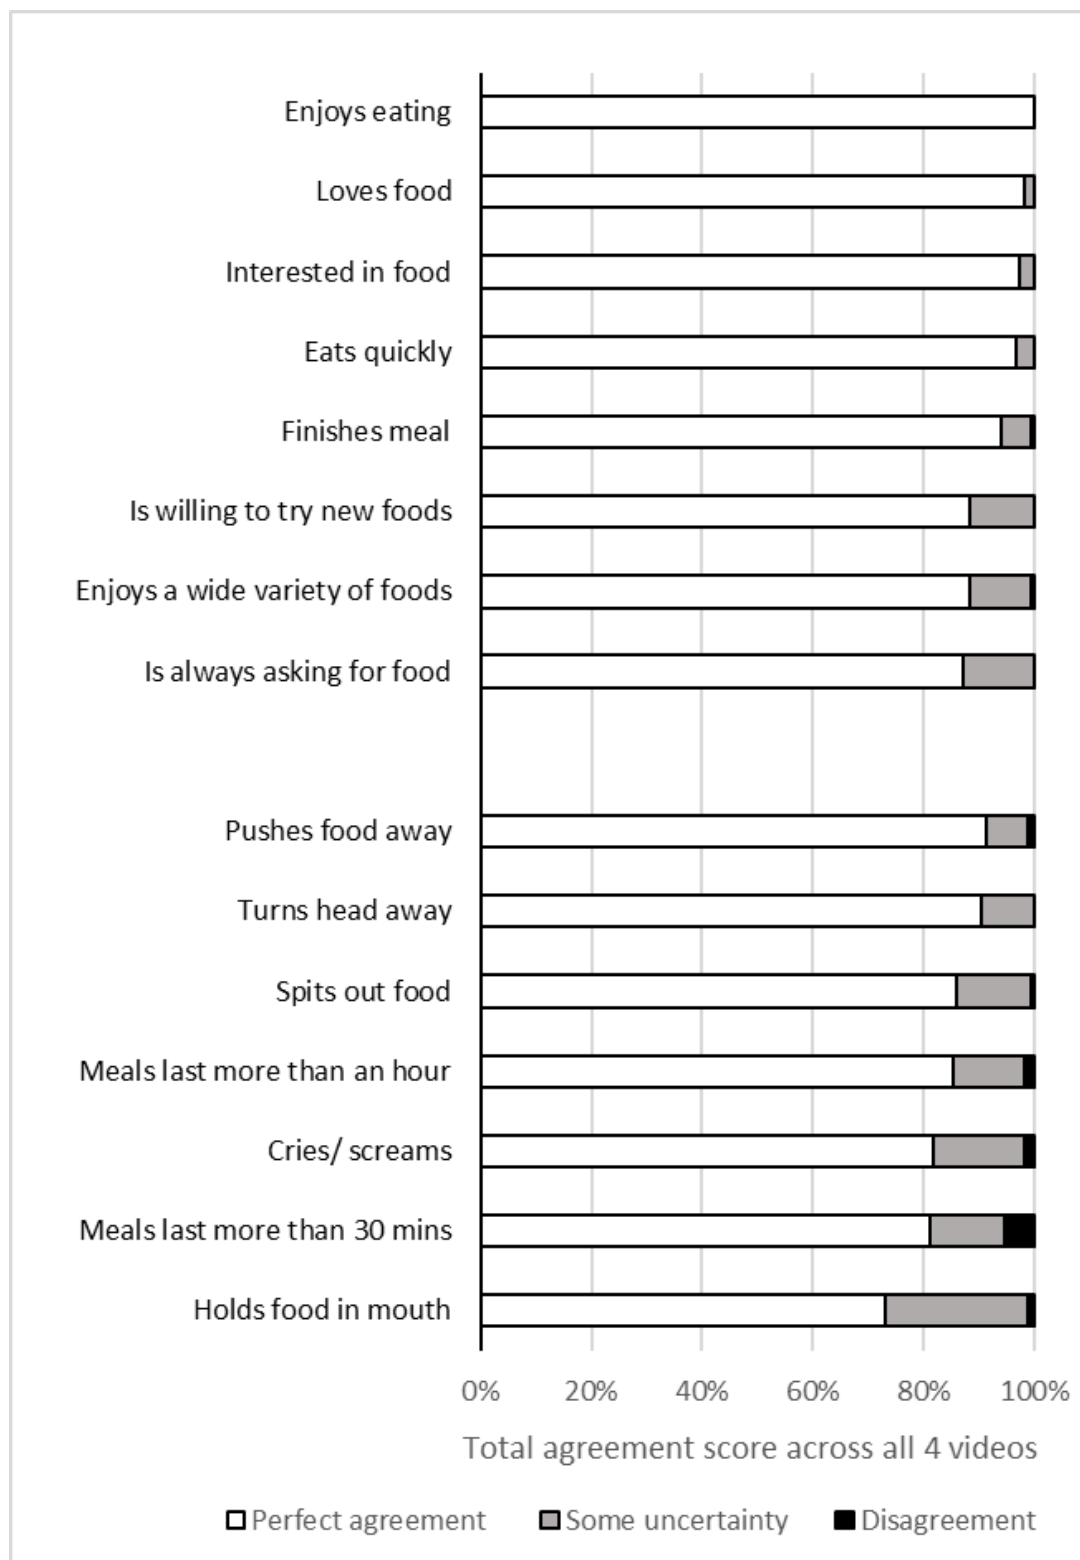

Supplement: s1 [file s1]
